# Supplementary material for: A do-it-yourself water quality sensor network to elucidate contaminant signatures and improve land management advice
Source: Research Square preprint supplement (doi:10.21203/rs.3.rs-7803377/v1), 2026-01-09
Supplement: Supplementary file 1 [file f479a1a760d35611a96efe7f.docx]

### Supplementary Information

# A do-it-yourself water quality sensor network to elucidate contaminant signatures and improve land management advice

James E. Dare1,2,3, Deniz Özkundakci1, Richard W. McDowell4,5

1*School of Science, The University of Waikato, Hamilton, New Zealand.*

2*Bay of Plenty Regional Council, Tauranga, New Zealand.*

3*AquaWatch Solutions, Auckland, New Zealand.*

4*Faculty of Agriculture and Life Sciences, Lincoln University, Lincoln, New Zealand.*

5*AgResearch, Lincoln Science Centre, Lincoln, New Zealand.*

**Table S1. Summary statistics for TN, TP, and TSS from the ten monitoring sites.** SD represents the standard deviation for each site, while the upper and lower quartiles are the 25th and 75th percentile values, respectively. All values aside from ‘n’ are in milligrams per litre (mg L-1). Statistics are calculated from routine samples only.

| **Parameter** | **Site Name** | **n** | **Median** | **SD** | **UQ** | **LQ** | **Min** | **Max** |
| --- | --- | --- | --- | --- | --- | --- | --- | --- |
| **TN** | Mangatoetoe at end of Black Rd | 29 | 1.85 | 0.56 | 2.21 | 1.50 | 0.81 | 2.84 |
| Oeutehuehue at Farm Box Culvert | 24 | 1.79 | 0.28 | 1.97 | 1.74 | 1.24 | 2.42 |
| Pokopoko at Allport Rd | 28 | 0.99 | 0.33 | 1.10 | 0.94 | 0.72 | 2.55 |
| Pokopoko at Old Coach Rd | 29 | 1.42 | 0.42 | 1.58 | 1.34 | 0.89 | 2.90 |
| Pongakawa at Old Coach Rd | 29 | 1.80 | 0.15 | 1.88 | 1.69 | 1.47 | 2.06 |
| Pongakawa trib at Rotoehu Rd | 29 | 2.03 | 0.31 | 2.31 | 1.89 | 1.61 | 2.74 |
| Pongakawa Tributary at Old Coach Road | 28 | 2.05 | 0.34 | 2.18 | 1.95 | 1.62 | 3.24 |
| Puanene at SH2 | 29 | 2.04 | 0.60 | 2.30 | 1.62 | 0.96 | 3.55 |
| Wharere at Maniatutu Rd | 27 | 2.37 | 0.34 | 2.47 | 2.28 | 1.26 | 2.60 |
| Wharere at Old Coach Rd | 29 | 2.31 | 0.36 | 2.49 | 2.00 | 1.70 | 3.47 |
| **TP** | Mangatoetoe at end of Black Rd | 29 | 0.103 | 0.094 | 0.116 | 0.089 | 0.057 | 0.493 |
| Oeutehuehue at Farm Box Culvert | 24 | 0.110 | 0.100 | 0.119 | 0.101 | 0.085 | 0.536 |
| Pokopoko at Allport Rd | 28 | 0.091 | 0.085 | 0.105 | 0.084 | 0.070 | 0.516 |
| Pokopoko at Old Coach Rd | 29 | 0.114 | 0.144 | 0.133 | 0.094 | 0.071 | 0.832 |
| Pongakawa at Old Coach Rd | 29 | 0.114 | 0.028 | 0.131 | 0.104 | 0.091 | 0.215 |
| Pongakawa trib at Rotoehu Rd | 29 | 0.133 | 0.059 | 0.173 | 0.115 | 0.079 | 0.372 |
| Pongakawa Tributary at Old Coach Road | 28 | 0.127 | 0.073 | 0.149 | 0.116 | 0.102 | 0.487 |
| Puanene at SH2 | 29 | 0.133 | 1.222 | 0.155 | 0.120 | 0.091 | 6.727 |
| Wharere at Maniatutu Rd | 27 | 0.119 | 0.048 | 0.125 | 0.114 | 0.105 | 0.338 |
| Wharere at Old Coach Rd | 29 | 0.126 | 0.122 | 0.136 | 0.115 | 0.100 | 0.764 |
| **TSS** | Mangatoetoe at end of Black Rd | 29 | 19.0 | 69.7 | 30.0 | 13.3 | 2.1 | 340.0 |
| Oeutehuehue at Farm Box Culvert | 24 | 20.6 | 135.8 | 38.6 | 14.0 | 7.4 | 667.5 |
| Pokopoko at Allport Rd | 28 | 55.9 | 358.6 | 110.1 | 35.8 | 10.1 | 1940.0 |
| Pokopoko at Old Coach Rd | 29 | 41.5 | 256.8 | 104.7 | 26.1 | 3.5 | 1413.3 |
| Pongakawa at Old Coach Rd | 29 | 19.7 | 42.9 | 67.8 | 10.0 | 2.0 | 145.5 |
| Pongakawa trib at Rotoehu Rd | 29 | 15.4 | 17.0 | 20.0 | 11.6 | 3.2 | 96.0 |
| Pongakawa Tributary at Old Coach Road | 28 | 10.5 | 125.5 | 19.4 | 5.8 | 1.7 | 672.0 |
| Puanene at SH2 | 29 | 20.6 | 70.5 | 35.8 | 14.0 | 3.6 | 392.0 |
| Wharere at Maniatutu Rd | 27 | 3.8 | 21.7 | 6.8 | 2.4 | 0.9 | 89.0 |
| Wharere at Old Coach Rd | 29 | 16.2 | 78.8 | 29.1 | 12.0 | 5.9 | 440.0 |

**Table S2. Online resources to assist with the development of DIY monitoring stations.** All of these websites were used to research ideas. However, the final monitoring stations were based on content from EnviroDIY and the EnviroDIY Github page.

| Resource | Description | Website |
| --- | --- | --- |
| Stroud Water Research Center | A nonprofit organization dedicated to advancing the understanding and stewardship of freshwater systems through scientific research, education, and watershed restoration. The developers of EnviroDIY and Monitor My Watershed. | https://stroudcenter.org/ |
| EnviroDIY | An online community for do-it-yourself environmental science and monitoring. EnviroDIY is part of [WikiWatershed](https://wikiwatershed.org/" \t "_blank), an initiative of [Stroud Water Research Center](https://stroudcenter.org/) designed to help people advance knowledge and stewardship of fresh water. | https://www.envirodiy.org/ |
| Monitor My Watershed | An online data sharing portal developed by the Stroud Water Research Institute. | https://monitormywatershed.org/ |
| EnviroDIY Github Page | A collection of code repositories to assist with DIY monitoring applications. | https://github.com/envirodiy |
| Hackaday | An engineering blog that includes articles on DIY water quality sensors. | https://hackaday.com/ |
| Yosemitech | Supplier of the Y11-A nephelometer used in this study, as well as numerous other water quality sensors. | https://www.yosemitech.com/ |
| METER Group | Supplier of the HYDROS-21 CTD sensor used in this study. | https://metergroup.com/ |
| DFRobot | DFRobot is a global provider of open-source hardware, robotics platforms, and STEM education kits, catering to DIY enthusiasts, educators, and industry developers | https://www.dfrobot.com/ |
| Hackster | An online community and platform for hardware developers, makers, and engineers to share projects, learn new skills, and collaborate on innovative technologies. | https://www.hackster.io/ |

**Table S3. Annual costs of the traditional monitoring network.** This includes all staff labour, sample analysis, and hydrological surveys associated with a traditional network design.

| Description | Frequency | Cost per unit (NZD) | Unit | Units per sample run | Run cost (NZD) | Runs per year | Total Cost (NZD) | Comment |
| --- | --- | --- | --- | --- | --- | --- | --- | --- |
| Staff labour | Monthly | $40 | Hour | 7.5 | $300 | 12 | $3,600.00 |  |
| Lab processing | Monthly | $100 | Sample | 10 | $1000 | 12 | $12,000.00 |  |
| Hydrological surveys | Annual | $45 | Hour | 40 | $1800 | 1 | $1,800.00 | It is assumed that it would take one week to gauge and process data for the nine sites that require flow data. These surveys would be carried out each year, and the full dataset would be used to develop a ‘ratio’ or relationship with a nearby hydrological site. |
| Total Annual Cost |  |  |  |  |  |  | $17,400.00 |  |

**Table S4. Costs associated with Mayfly sensor stations.** This includes all of the individual components required to create the ten sensor stations. GST stands for ‘Goods and Services Tax’ which is a New Zealand tax (15%) placed on the purchase of goods, including imported goods that are valued at over $1000 NZD.

| Item Description | Cost (NZD) | Quantity | Total (NZD) |
| --- | --- | --- | --- |
| Mayfly circuit board (pack 5) | $140 | 10 | $1,403.27 |
| Mayfly circuit board shipping | $145.20 | 1 | $231.09 |
| LTE modem | $133.83 | 10 | $1,338.26 |
| LTE adapter (Pack of 5) | $19.24 | 10 | $192.36 |
| HYDROS CTD sensor | $724.80 | 10 | $7,248.00 |
| HYDROS sensor shipping | $152.61 | 1 | $152.61 |
| HYDROS sensor import tax (GST) | $1,110.09 | 1 | $1,110.09 |
| Yosemitech nephelometer with brush | $1,019.60 | 10 | $10,196.00 |
| Yosemitech import tax (GST) | $1,529.48 | 1 | $1,529.48 |
| Cases | $30 | 10 | $300.00 |
| Misc Electrical | $10 | 10 | $100.00 |
| Misc Attachments | $50 | 10 | $500.00 |
| LiPO battery | $26.90 | 10 | $269.00 |
| Metal Stake | $10 | 20 | $200.00 |
| Solar Panel Equipment | $91.81 | 10 | $918.10 |
| Wingshield - Step up regulator | $10.36 | 10 | $103.61 |
| Wingshield - Step up regulator shipping | $55.47 | 1 | $55.47 |
| Wingshield - PCB | $13.87 | 1 | $13.87 |
| Wingshield - PCB Shipping | $22.20 | 1 | $22.20 |
| Wingshield - TTL to RS485 adapter (set 5) | $4.04 | 10 | $40.44 |
| Capacitors | $1 | 10 | $10.00 |
| Sum |  |  | $25,933.85 |
| Buffer (5%) |  |  | $1,296.69 |
| Total |  |  | $27,230.54 |
| Total per unit |  |  | $2,723.05 |

**Table S5. Cost of Mayfly network operation per year.** This table shows the additional costs associated with the Mayfly sensor network including: the initial capital cost, sensor maintenance, autosampler deployment, and autosampler lab processing. Costs are calculated for the Mayfly network and then added to traditional network cost to calculate the total cost.

| Description | Cost type | Frequency | Cost per unit (NZD) | Unit | Units per run | Run cost (NZD) | Runs per year | Cost per year | Comment |
| --- | --- | --- | --- | --- | --- | --- | --- | --- | --- |
| Autosampler deployment | Labour | Storm event | 40 | Hour | 2 | 80 | 8 | $640 | Assumed that eight events are captured across the network per year. Each event requires two hours labour to deploy and retrieve autosamplers |
| Autosampler Lab Processing | Contract | Storm event | 100 | Sample | 24 | 2400 | 8 | $19,200 | Current cost quoted by BOPRC lab per sample. |
| Routine Sensor Maintenance | Labour | Bi-monthly | 40 | Hour | 5 | 200 | 6 | $1,200 | Maintained every two months. It takes five hours to service the network. |
| Mayfly Equipment | Capital | One-off | $2,715 | Station | 10 | $27,150 |  | $9,050 | One off capital cost split over a three-year period. |
| Total Additional Mayfly |  |  |  |  |  |  |  | $30,090 | Additional cost of the enhanced Mayfly monitoring network. |
| Total Traditional Network |  |  |  |  |  |  |  | $17,400 | The cost of the status quo monitoring programme (Table S3) |
| Grand Total Mayfly Network |  |  |  |  |  |  |  | $47,490 | Total annual cost of the enhanced Mayfly monitoring network. |
